# Supplementary material for: Evaluation of open and closed path sampling systems for determination of emission rates of NH 3 and CH 4 with inverse dispersion modelling
Source: Copernicus journal article supplement (doi:10.5194/egusphere-2022-867), 2022-09-22
Supplement: Supplementary file [file egusphere-2022-867-RC1-supplement.pdf]

## Review of egosphere-2022-867

This study presents results from a series of controlled release experiments, designed to evaluate the accuracy and precision of  $\text{NH}_3$  and  $\text{CH}_4$  flux estimates made using a stochastic Lagrangian dispersion model and various measurement configurations. In particular, the use of open-path and closed-path measurement systems is compared for both gases. For reasons that are well described in the introduction to this study, such controlled release experiments can provide valuable insight to help guide both the measurement and modelling strategy adopted by future studies targeting “real world” emissions. The interpretation of the results presented here is complicated by the fact that each controlled release experiment did not involve the same set of measurement approaches, but I understand the logistical reasons for this. However, I feel that the presentation of both the results and conclusions needs some revision in order to help the reader to draw clear conclusions from this work. Overall, I suggest that the study is well suited for publication in AMT once the following points have been addressed.

The methods and instrumentation used in this study are generally clearly described. However, it would be good to see some more discussion of instrument calibration in this section. It is mentioned subsequently (L389) that ease of calibration is an important advantage of closed-path systems over open-path systems – I have no doubt that this is the case, but it is hard to assess this without more detail on the respective calibration strategies. From a modelling perspective, the bLS model including  $\text{NH}_3$  deposition is crucial to the results presented in the paper, but there are no details of it given in the methods section. I appreciate that a full description is given in Häni et al. (2018), but I think it is important to include a basic summary here too (possibly including Eq. 17 and 18 from Häni et al. (2018)).

The presentation of results could in general be made clearer. As the authors state in the introduction, a key component of this study is the simultaneous release of  $\text{CH}_4$  and  $\text{NH}_3$ , to disentangle methodological and depositional factors resulting in recovery rates less than 1. However, results from the two gases are not really considered together in section 3. For instance, it is concluded that heating Line 3 to a higher temperature resulted in reduced  $\text{NH}_3$  loss in VIII-DK, but there is also an apparent improvement in  $\text{CH}_4$  recovery rate using Line 3 as opposed to Line 2 for this experiment. How can this be explained? I suggest that the results section needs some reworking to take full advantage of the two-gas releases, so that the  $\text{NH}_3$  results in each experiment are considered in the context of the corresponding  $\text{CH}_4$  results.

It also took me a while to interpret Figs. 2-4. I would suggest combining the two  $\text{NH}_3$  figures into a single figure (as has been done for  $\text{CH}_4$ ). It may be even better to include the results for both gases in a single 2-panel figure, so that the results for each gas can easily be compared for the same experiment. Since the mean values are quoted in the text, it would be good to include these on the plots (as crosses perhaps). I would also state explicitly at the beginning of section 3.1 that the  $Q_{\text{bLS}}$  values presented here for  $\text{NH}_3$  do not take deposition into account.

The clarity of section 3.4 could also be improved. The statement that an artificial source has a higher deposition velocity than a real source needs more explanation and discussion. Is this the case in reality, or just a consequence of the way the bLS model is constructed? How does this impact the

interpretation of the results presented in this paper? It is unclear to me why the deposition velocity increases with distance from the source, or why this means that most  $\text{NH}_3$  is deposited near the source (as stated in L408). More discussion is required to interpret the results shown in Figure 8 – what conclusions should we draw from the comparison against the empirical models?

The conclusion section does not currently summarise the key results from the paper particularly effectively. The opening statement is not supported by the average all-instrument  $\text{CH}_4$  recovery rate that is quoted – this needs to be separated into the two instrument types (as it is for  $\text{NH}_3$ ). I do not understand the statement “The present study shows that the deposition algorithm included in the bLS model estimates correct  $\text{NH}_3$  emissions that considers surface deposition”. My understanding of the results presented here is that the deposition velocity is estimated *by* the bLS model. This deposition velocity appears to vary with distance and differs from the empirical model results. So I’m not sure how it can be determined that this estimate is “correct”? It seems that the important conclusion of this comparison relies on an interpretation of the differences shown in Figure 8. I think there are important lessons to be drawn from this study regarding both measurement strategy and the modelling of  $\text{NH}_3$  deposition velocity, but without a better synthesis of results it is currently hard for the reader to determine what these lessons are.

Specific points:

There are quite a few cases of incorrect number agreement (e.g. “the downwind concentration were”) – I haven’t listed them below, but it would be good if these could be corrected on the next proofread.

L16 – averaged *over* intervals

L77 – *non* ideal conditions

L196 – I’m confused by the fact that there are three experiments and two instruments listed here, but only four background values quoted. Should there be two more? It should be made clearer which value corresponds to which instrument-experiment combination, either by rephrasing the sentence or adding a table.

L249 – with *an* empirical equation

L251 –  $R_c$  *is* unidirectional

L334 – If I’m interpreting the results correctly, there is no significant difference between the Line 2  $\text{NH}_3$  results at different distances. In which case I would suggest removing this sentence.

L336 – remove “stick”

L339 – it would be good to expand on why there was no difference after an hour

L347 – sentence needs rephrasing

L393 – sentence needs rephrasing

L406 – remove “increases, with many cases”

L416 – this discussion loses me; in what way are the values from Line 1 higher than those from Lines 2 and 3? This seems to directly contradict the values stated above.

L571 – The doi for Häni et al. (2018) is for a preprint – please replace with the doi for the final published article.
